# Supplementary material for: Nanofibers generated from nonclassical organogelators based on difluoroboron β-diketonate complexes to detect aliphatic primary amine vapors
Source: Royal Society of Chemistry journal article supplement (doi:10.1039/c6tc01790h), 2016-01-01
Supplement: c6tc01790h1.pdf [file c6tc01790h1.pdf]

## Supporting Information for:

### **Nanofibers generated from nonclassical organogelators based on difluoroboron $\beta$ -diketonate complexes to detect aliphatic primary amine vapors**

Lu Zhai, Mingyang Liu, Pengchong Xue, Jingbo Sun, Peng Gong, Zhenqi Zhang, Jiabao Sun and  
Ran Lu\*

State Key Laboratory of Supramolecular Structure and Materials, College of Chemistry, Jilin

University, Changchun 130012, P. R. China

E-mail: [luran@mail.jlu.edu.cn](mailto:luran@mail.jlu.edu.cn)

#### **Contents:**

|                                                                                                               |    |
|---------------------------------------------------------------------------------------------------------------|----|
| 1. Photophysical data of <b>ABA</b> , <b>ABVA</b> and <b>AVBVA</b> .                                          | S2 |
| 2. Cyclic voltammetry curves of <b>ABA</b> , <b>ABVA</b> and <b>AVBVA</b> .                                   | S3 |
| 3. Pictures of the gels.                                                                                      | S3 |
| 4. XRD pattern of xerogel <b>ABVA</b> .                                                                       | S4 |
| 5. UV-vis absorption spectra of <b>ABVA</b> in xerogel-based films upon exposed to <i>n</i> -propylamine.     | S4 |
| 6. <sup>1</sup> H NMR spectral changes of <b>ABVA</b> in CDCl <sub>3</sub> upon adding <i>n</i> -propylamine. | S5 |
| 7. Fluorescence emission spectra of the xerogel-based films of <b>ABVA</b> upon exposed to organic amines.    | S6 |
| 8. <sup>1</sup> H NMR, <sup>13</sup> C NMR and MS spectra.                                                    | S7 |

**Table S1.** Photophysical data of **ABA**, **ABVA** and **AVBVA**.

| Complex      | Solvent     | $\lambda_{\text{abs}}$<br>(nm) | $\lambda_{\text{em}}$<br>(nm) | Stokes<br>shift<br>( $\text{cm}^{-1}$ ) | $\Phi_{\text{F}}$ <sup>a</sup> |
|--------------|-------------|--------------------------------|-------------------------------|-----------------------------------------|--------------------------------|
| <b>ABA</b>   | Cyclohexane | 488                            | 518                           | 1186                                    | -                              |
|              | Toluene     | 500                            | 552                           | 1884                                    | 0.97                           |
|              | THF         | 501                            | 585                           | 2866                                    | 0.21                           |
|              | Acetone     | 502                            | 612                           | 3580                                    | -                              |
|              | DMSO        | 516                            | 614                           | 3093                                    | -                              |
| <b>ABVA</b>  | Cyclohexane | 501, 527                       | 553                           | 892                                     | -                              |
|              | Toluene     | 541                            | 590                           | 1535                                    | 0.70                           |
|              | THF         | 539                            | 632                           | 2729                                    | 0.15                           |
|              | Acetone     | 542                            | 655                           | 3183                                    | -                              |
|              | DMSO        | 560                            | 678                           | 3108                                    | -                              |
| <b>AVBVA</b> | Cyclohexane | 525, 558                       | 582                           | 739                                     | -                              |
|              | Toluene     | 574                            | 621                           | 1319                                    | 0.82                           |
|              | THF         | 573                            | 655                           | 2185                                    | 0.13                           |
|              | Acetone     | 578                            | 699                           | 2995                                    | -                              |
|              | DMSO        | 600                            | 711                           | 2003                                    | -                              |

<sup>a</sup> Fluoresce in 1M NaOH ( $\Phi_{\text{F}} = 0.95$ ) was used as the standard in measuring  $\Phi_{\text{F}}$  for **ABA** and **ABVA**, and cresyl violet in methanol ( $\Phi_{\text{F}} = 0.53$ ) was used as the standard in measuring  $\Phi_{\text{F}}$  for **AVBVA**.

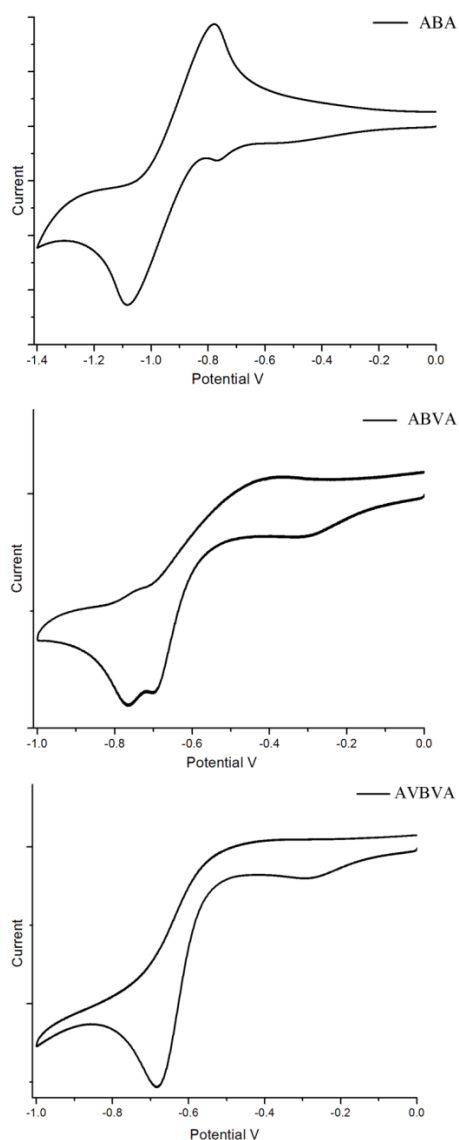

**Figure S1.** Cyclic voltammery diagrams of complexes **ABA**, **ABVA** and **AVBVA** in anhydrous  $\text{CH}_2\text{Cl}_2$  with 0.1 M  $\text{Bu}_4\text{NBF}_4$  as electrolyte at a scan rate of 50 mV/s.

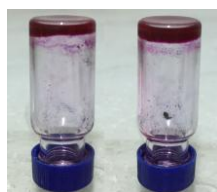

**Figure S2.** Pictures of the gels of **ABVA** (left) and **AVBVA** (right) obtained from 1,4-dioxane/cyclohexane (v/v = 1/4).

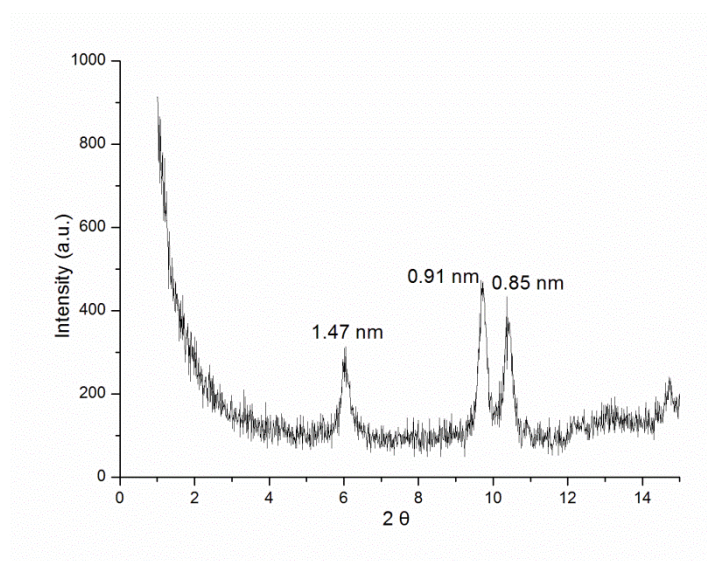

**Figure S3.** XRD pattern of xerogel ABVA.

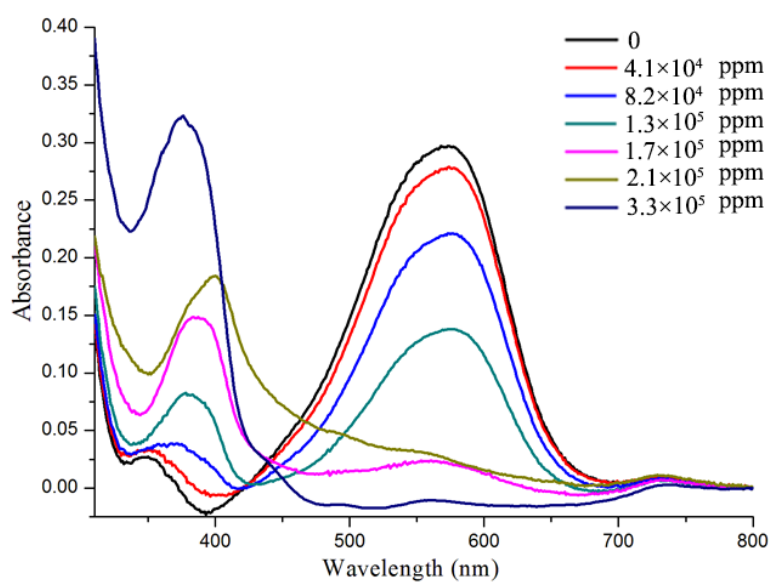

**Figure S4.** UV-vis absorption spectra of the xerogel-based films of ABVA upon exposure to *n*-propylamine in different concentrations for 30 s.

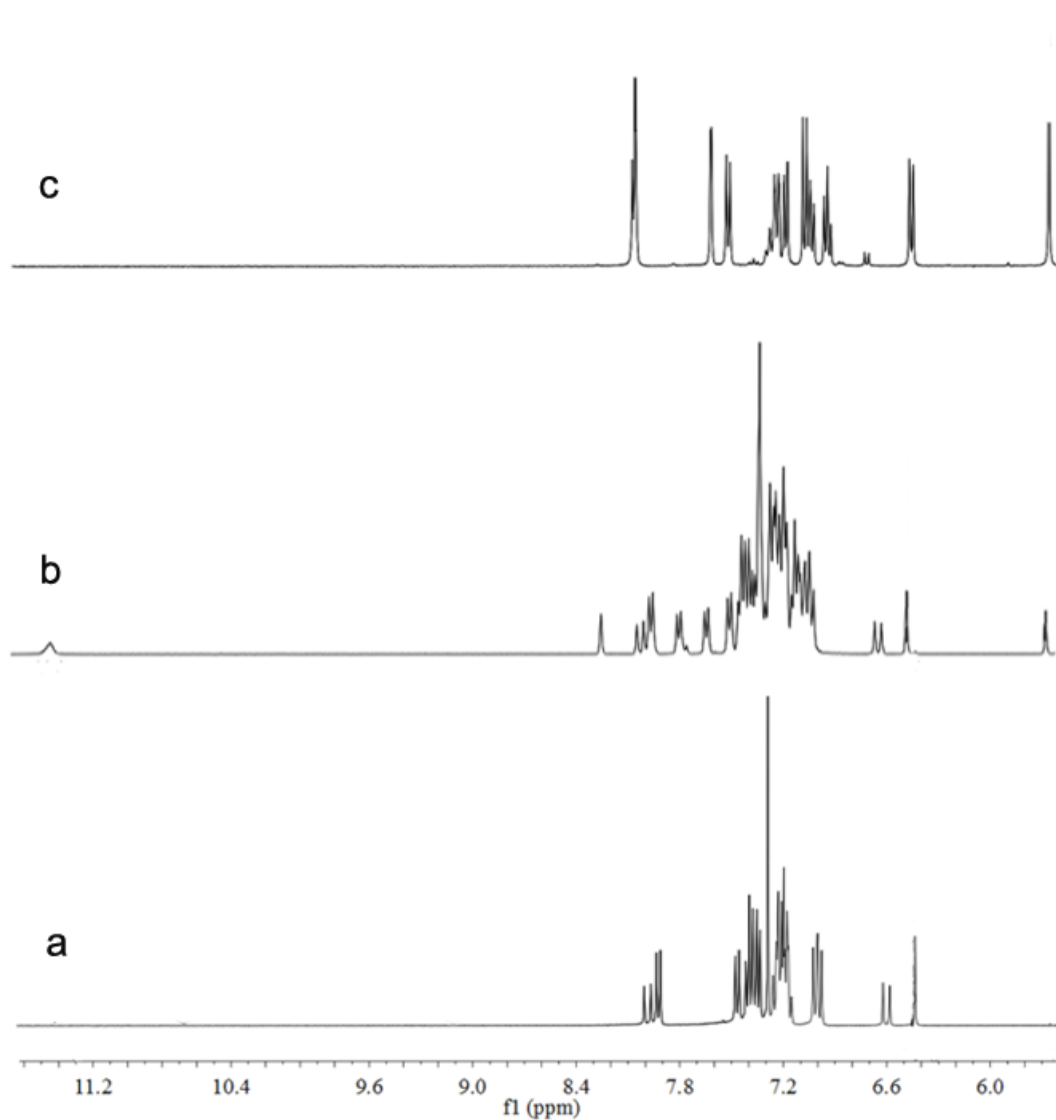

**Figure S5.**  $^1\text{H}$  NMR (400 MHz) spectra of **ABVA** in  $\text{CDCl}_3$  ( $3.2 \times 10^{-3}$  M) before (a) and after (b) adding  $2.0 \times 10^3$  equiv. of *n*-propylamine as well as (c) further adding a drop of  $\text{D}_2\text{O}$ .

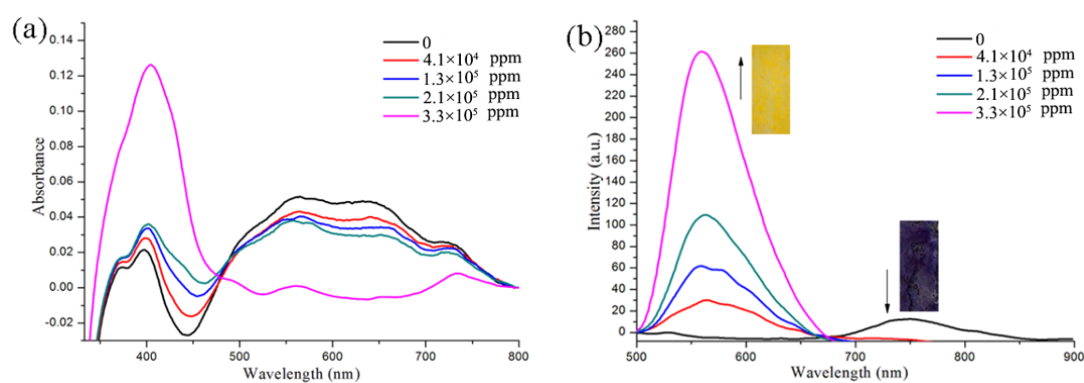

**Figure S6.** UV-vis absorption (a) and fluorescence emission (b,  $\lambda_{\text{ex}} = 400$  nm) spectra of the xerogel-based film of **AVBVA** upon exposure to *n*-propylamine in different concentrations for 30 s. Insets: the fluorescence enhanced of the xerogel films after being added into a cell filled with the vapors of *n*-propylamine.

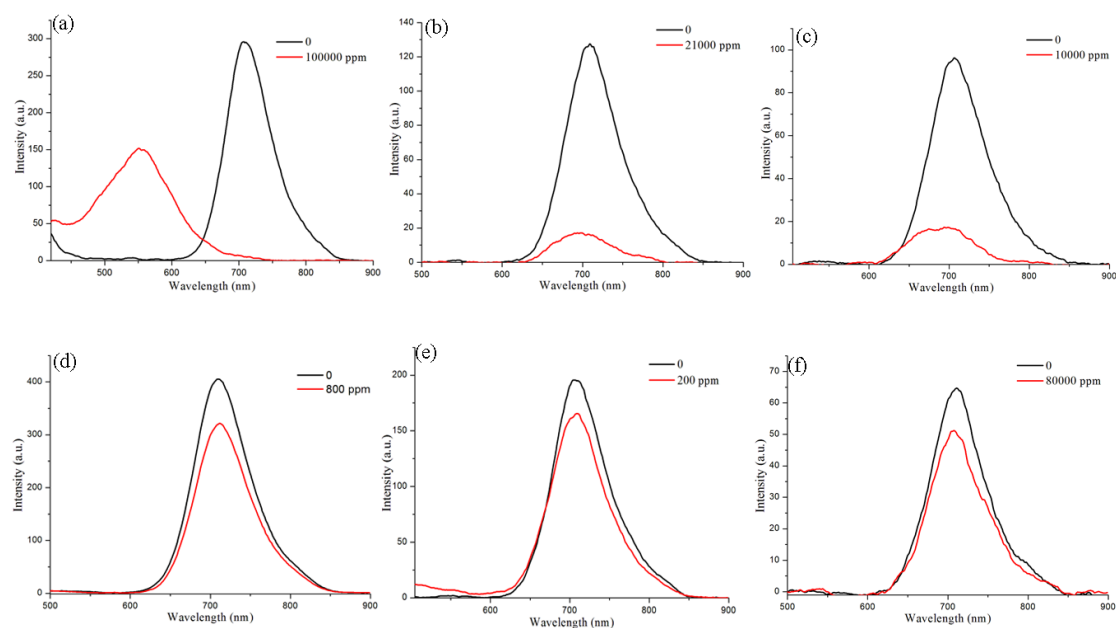

**Figure S7.** Fluorescence emission spectra of the xerogel film based on **ABVA** upon exposure to saturated vapors of *n*-butylamine (a), pyridine (b), cyclohexylamine (c), aniline (d), tributylamine (e) and triethylamine (f) for 30 s. The excitation wavelength is 360 nm.

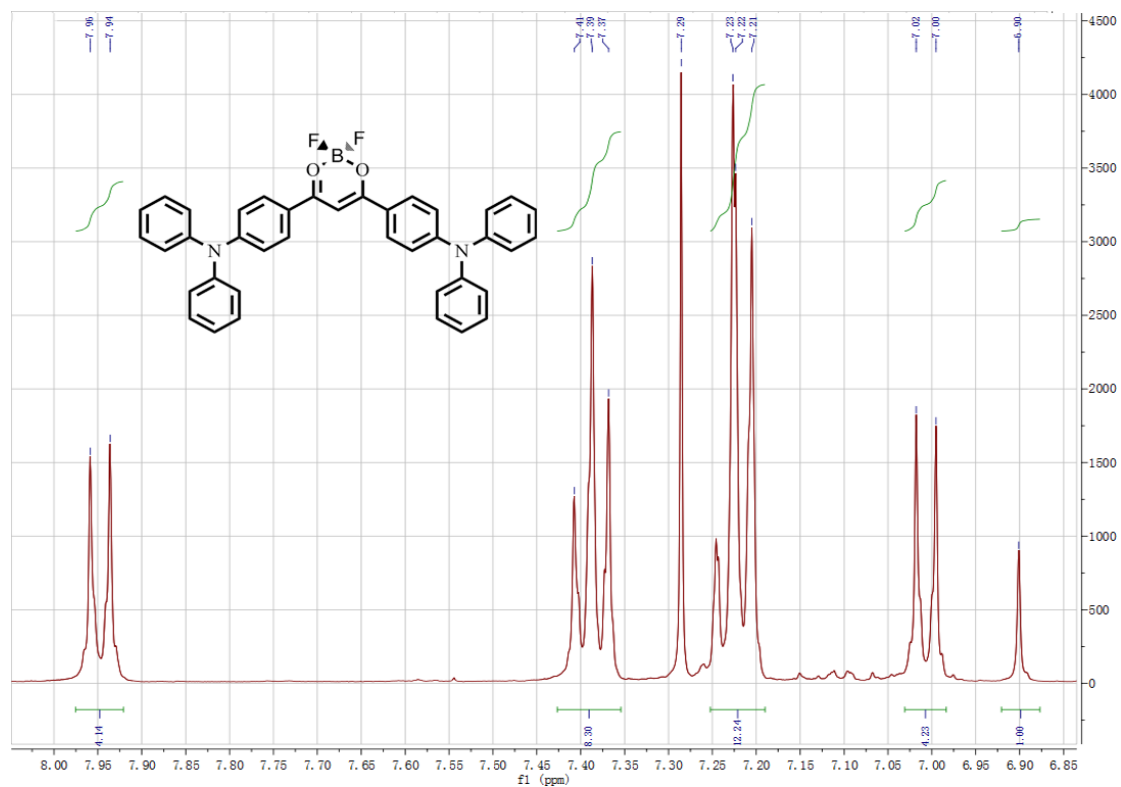

Figure S8.  $^1\text{H}$  NMR (400 MHz) spectrum of **ABA** in  $\text{CDCl}_3$ .

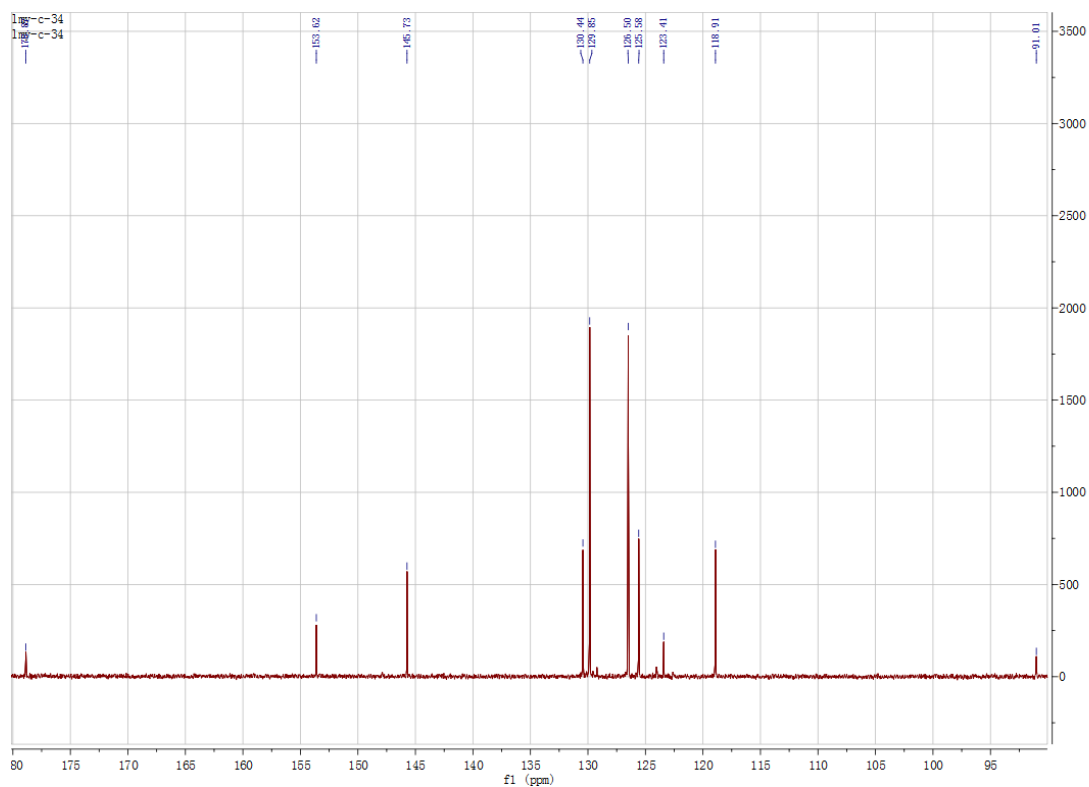

Figure S9.  $^{13}\text{C}$  NMR (100 MHz) spectrum of **ABA** in  $\text{CDCl}_3$ .

Reflectron Mode

Data: LR-248-Ln0001.L13 4 Jan 2015 15:46 Cal: 30 Jan 2015 14:16  
Kratos PC Axima CFR V2.3.1: Mode default\_linear\_neg, Power: 95, P.Ext. @ 606 (bin 57)  
%Int. 129 mV[sum= 8620 mV] Profiles 1-67 Smooth Av 20 -Baseline 80

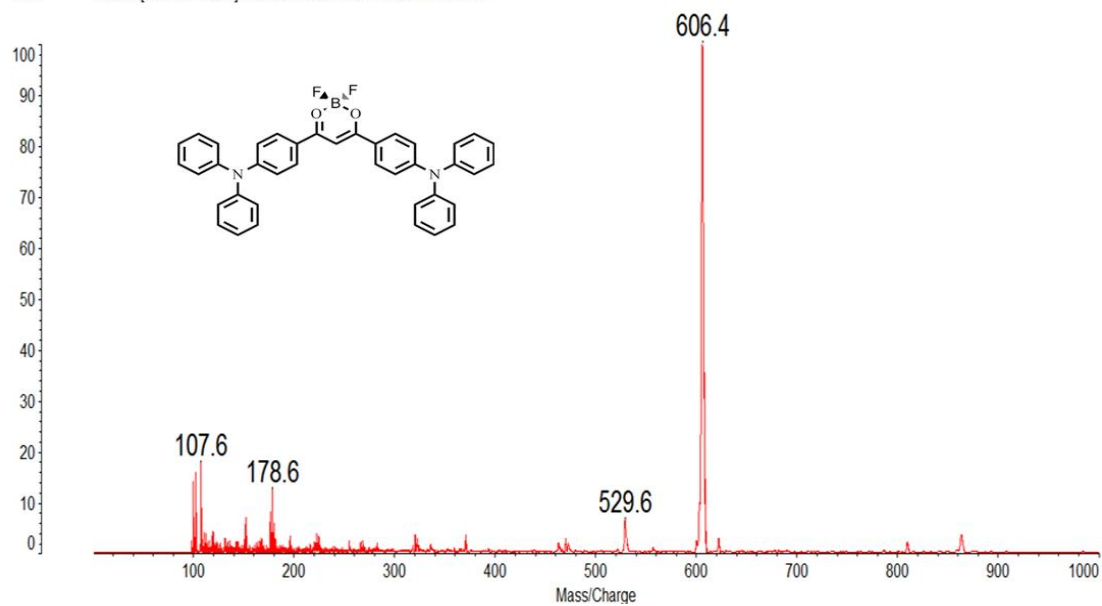

**Figure S10.** MALDI/TOF MS spectrum of ABA.

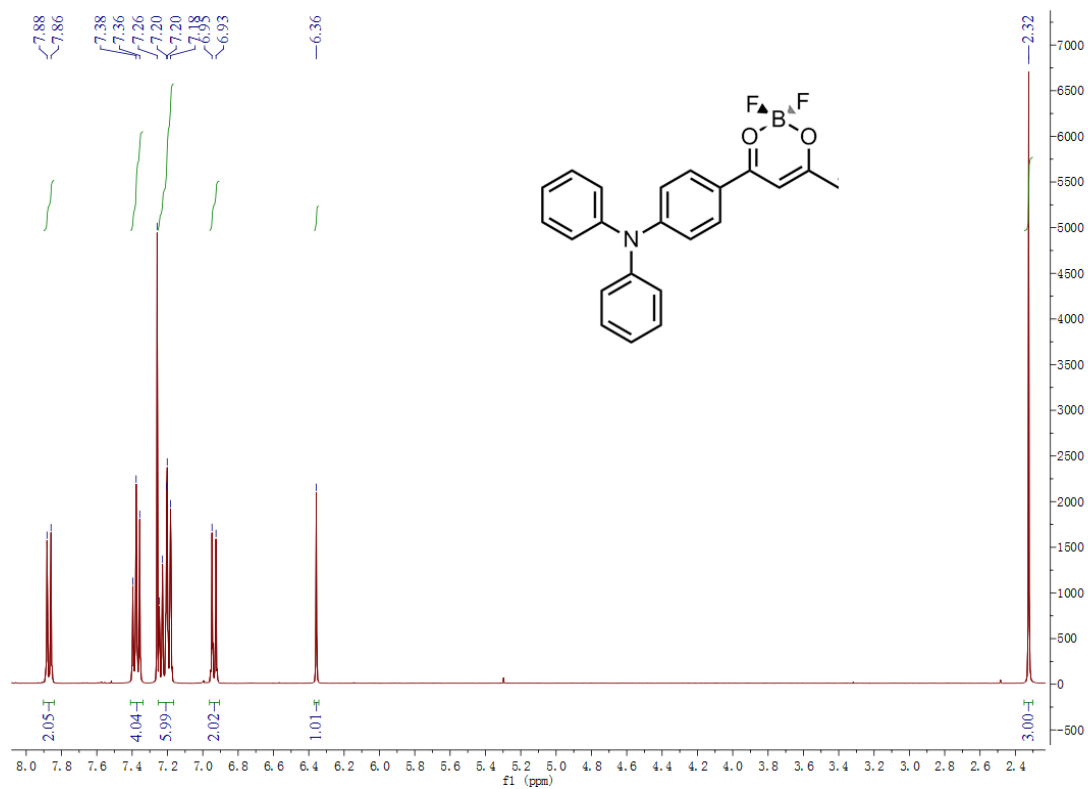

**Figure S11.**  $^1\text{H}$  NMR (400 MHz) spectrum of compound **3** in  $\text{CDCl}_3$ .



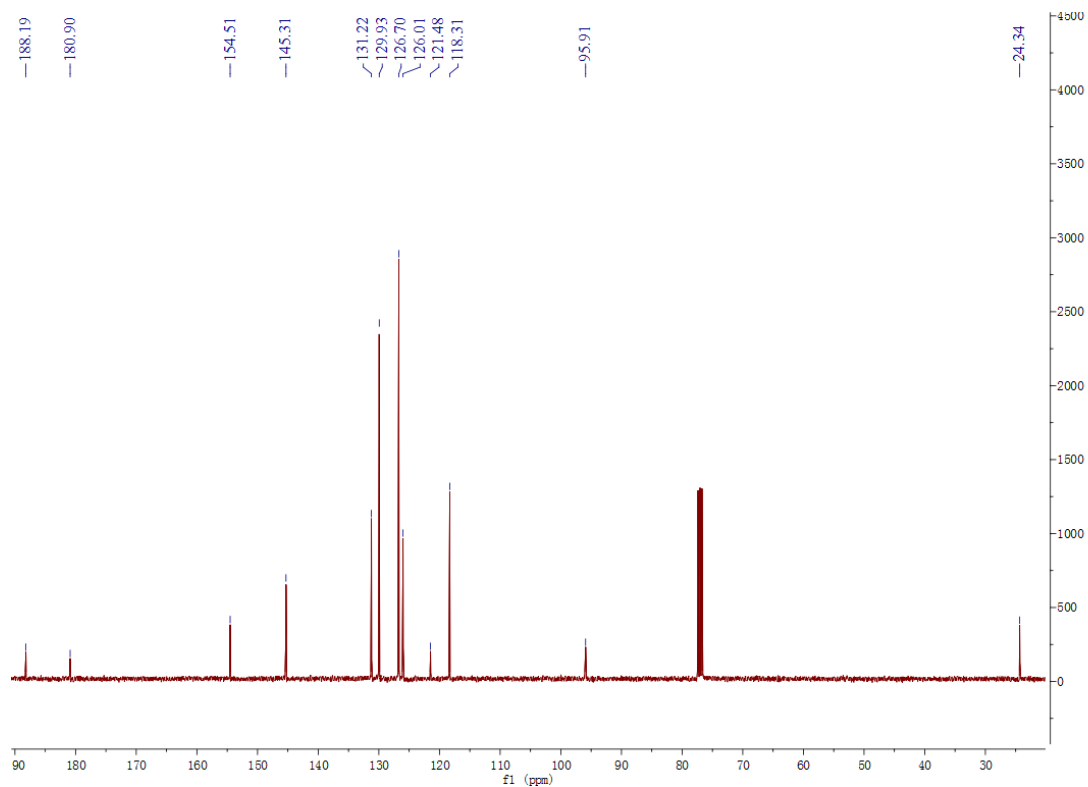

**Figure S12.**  $^{13}\text{C}$  NMR (100 MHz) spectrum of compound **3** in  $\text{CDCl}_3$ .

Reflection Mode

Data: LR-42-L0001.M15 29 Apr 2016 11:23 Cal: 2 May 2016 9:45  
 Kratos PC Axima CFR V2.3.1: Mode default\_linear, Power: 85, P.Ext. @ 377 (bin 57)

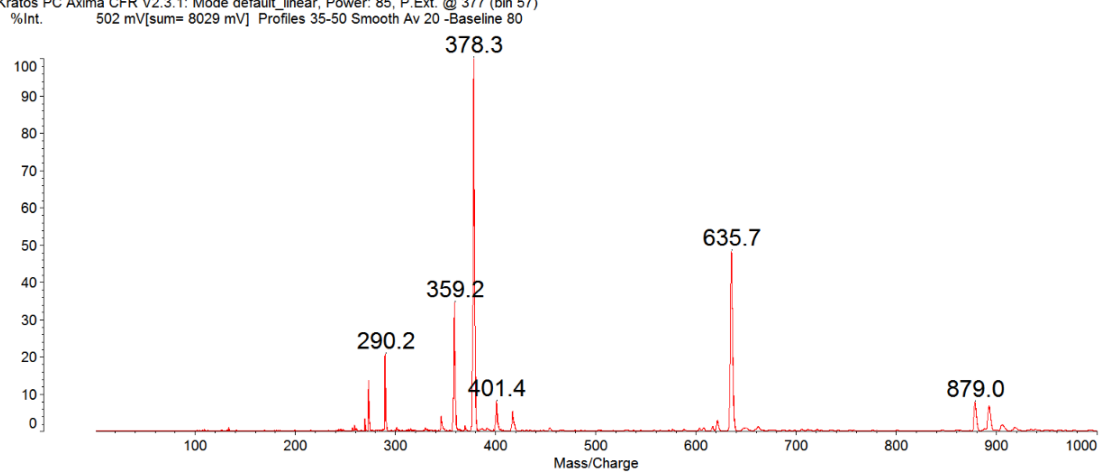

**Figure S13.** MALDI/TOF MS spectrum of **3**.

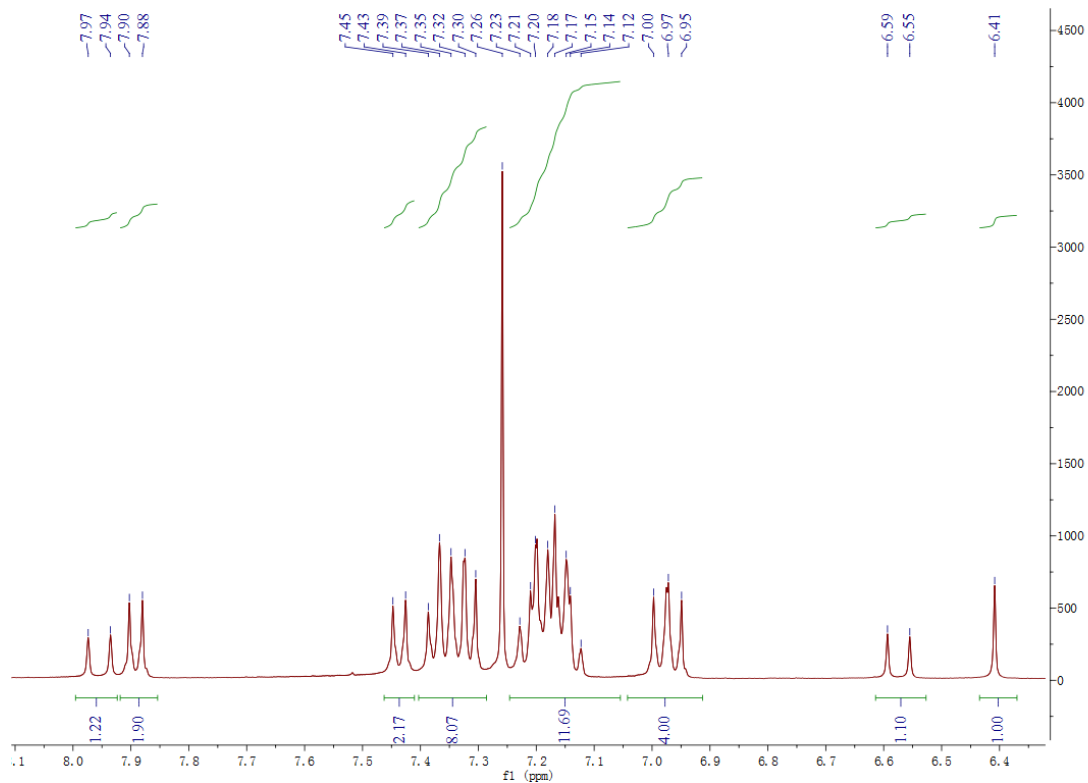

Figure S14.  $^1\text{H}$  NMR (400 MHz) spectrum of ABVA in  $\text{CDCl}_3$ .

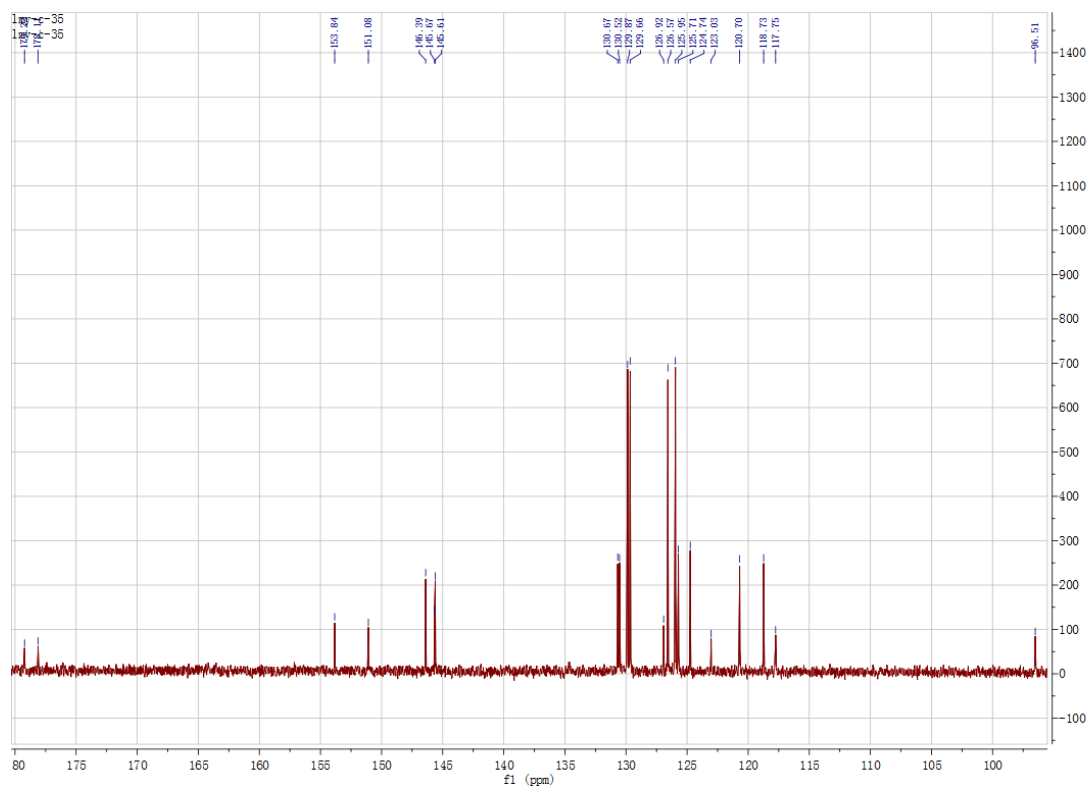

Figure S15.  $^{13}\text{C}$  NMR (100 MHz) spectrum of ABVA in  $\text{CDCl}_3$ .

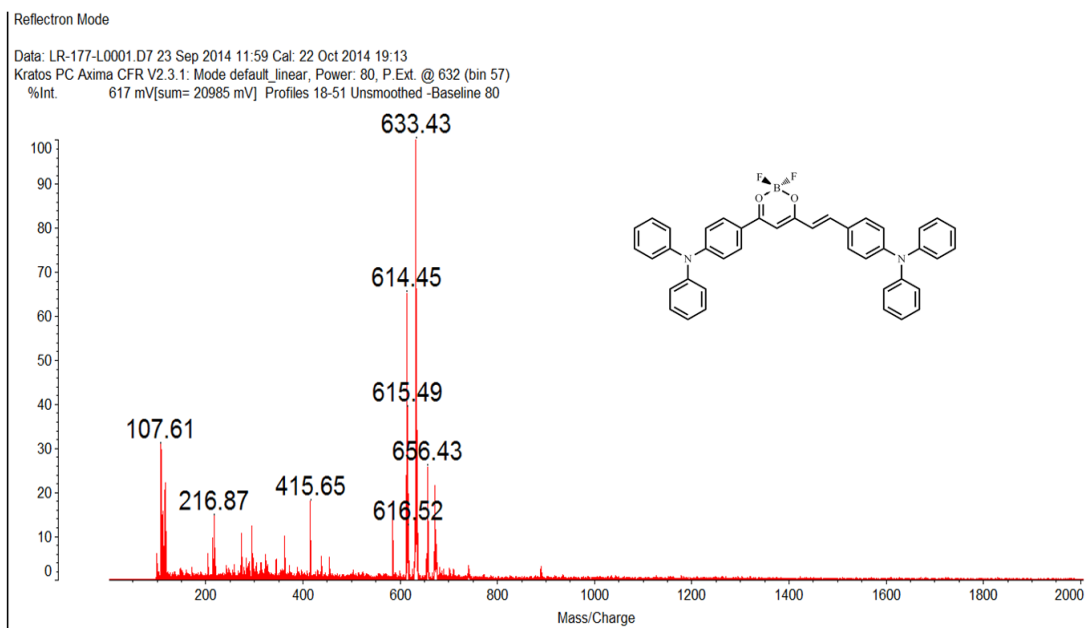

**Figure S16.** MALDI/TOF MS spectrum of ABVA.

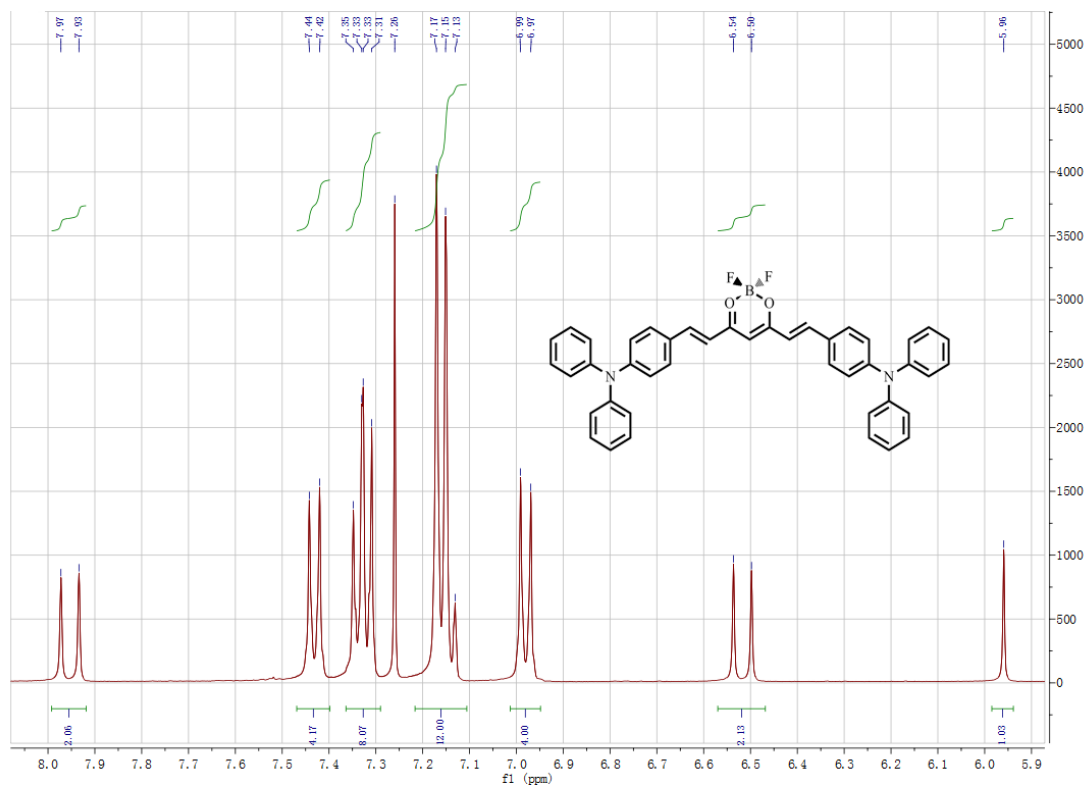

**Figure S17.**  $^1\text{H}$  NMR (400 MHz) spectrum of AVBVA in  $\text{CDCl}_3$ .

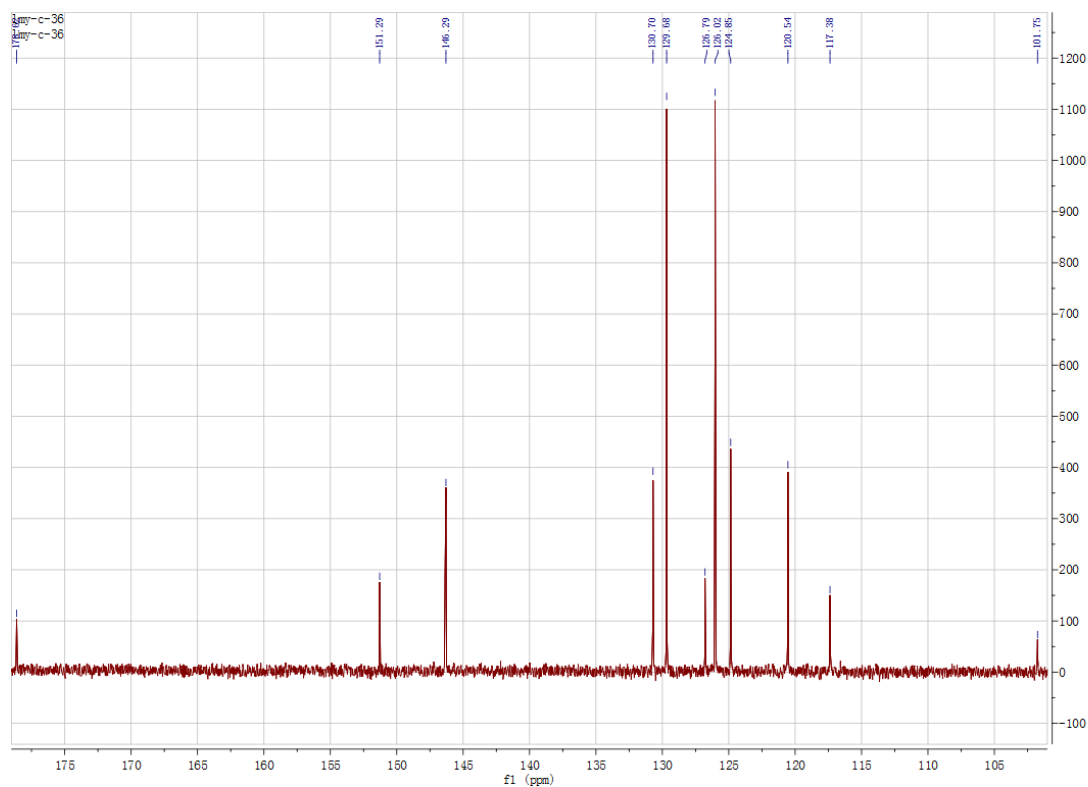

Figure S18.  $^{13}\text{C}$  NMR (100 MHz) spectrum of AVBVA in  $\text{CDCl}_3$ .

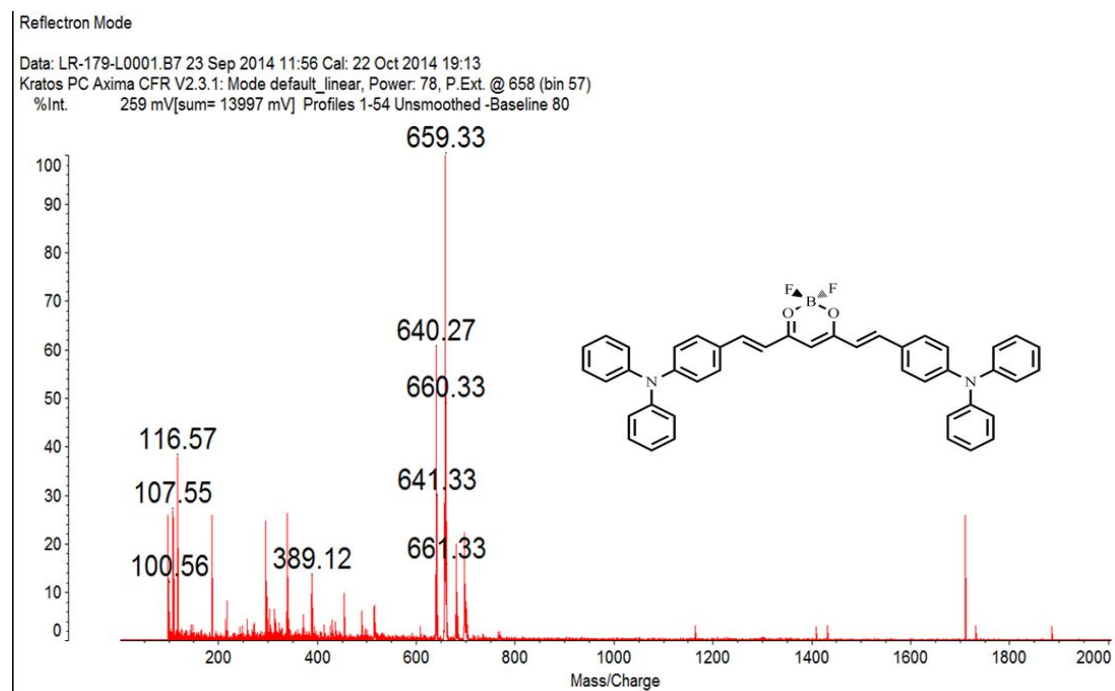

Figure S19. MALDI/TOF MS spectrum of AVBVA.
